# Supplementary material for: Effects of Erythromycin on Osteoclasts and Bone Resorption via DEL-1 Induction in Mice
Source: MDPI journal article supplement (doi:10.3390/antibiotics10030312), 2021-03-17
Supplement: s1 [file s1]

**Materials and Methods S1: Supplementary Materials and Methods for supplementary figures.**

**1. Murine Tooth Ligation Model**

To generate ligature-induced periodontitis, a 5–0 silk ligature (Akiyama MEDICAL MFG. CO., LTD., Tokyo, Japan) was tied around the maxillary second molar. Antibacterial drugs (ERM; 20 mg/kg body weight, PC; 10000 unit/kg body weight, JM; 20 mg/kg body weight), or distilled water (DW) were administered orally once a day for 7 days in the intervention experiments. The mice were euthanized 7 days after ligature placement.

**2. Analysis of Bacteria Attached to the Ligature**

The tube with the ligature was vortexed for 1 min 30 s. The PBS in this tube was diluted after agitation by 10-, 100-, 1000-, and 10000-fold. A volume of 100  $\mu$ L of each dilution was inoculated on individual blood agar plates. Cells were cultured overnight in aerobic or anaerobic conditions at 37°C. The appropriate plate (1000-fold or 10000-fold dilution) suitable for counting colonies was selected for the analysis.

**3. Cell Viability**

BMM cells were seeded in FACPS/CaP-coated plates at a density of  $1.0 \times 10^5$  cells/well and incubated for 7 days. Cells were treated with ERM (1, 10, and 20  $\mu$ g/mL), PC, or JSM for 7 days. Cell viability was assessed using the MTT assay, in which MTT (400  $\mu$ g/mL) was directly added to the cultures, followed by incubation at 37°C and 5% CO<sub>2</sub> in humidified air. Subsequently, the supernatant was aspirated, and 200  $\mu$ L of lysis solution (90% isopropanol, 0.5% SDS, 0.04 N HCl, DW) were added to dissolve the formazan dye. The optical density (OD) was measured at 570 nm using a microplate reader. The mean OD of the control group was set as 1, and the experimental groups were compared to this control group.

**Supplementary figures S1-S3**

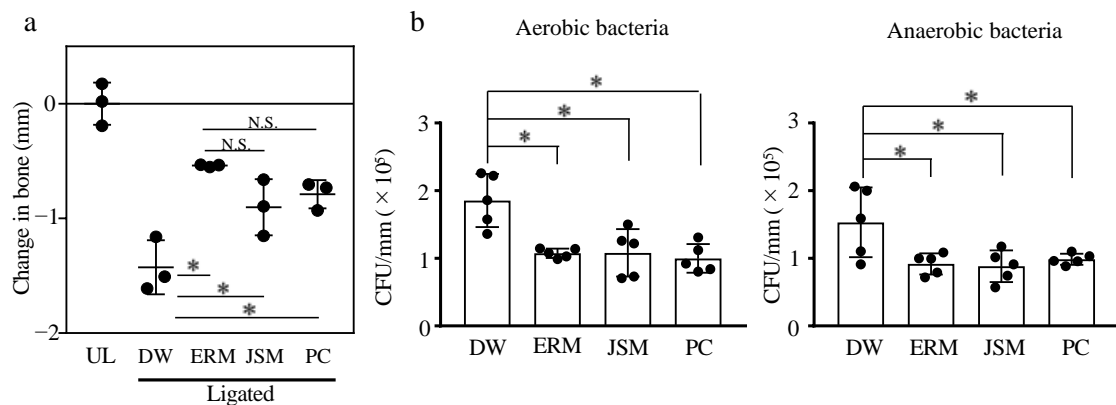

**Figure S1.** Oral administration of antibacterial drugs had no apparent immunomodulatory effects. Periodontal bone loss was induced by ligating the maxillary second molar. The unligated (UL) group was set as the baseline control. Groups of mice were administrated orally either distilled drinking water (DW; control) alone or with erythromycin (ERM), josamycin (JSM), or penicillin (PC). (a) The distance from the cement-enamel junction (CEJ) to the pinnacle of the alveolar bone was measured at seven predetermined points on the ligated second molar and the affected adjacent regions. Negative values (in mm) indicate bone loss relative to the baseline (unligated control). (b) Number of aerobic and anaerobic bacteria attached to the silk ligature. \* $p < 0.05$ , compared to the ethanol (EtOH) group, means  $\pm$  SD ( $n = 5$  per group). N.S., not significant.

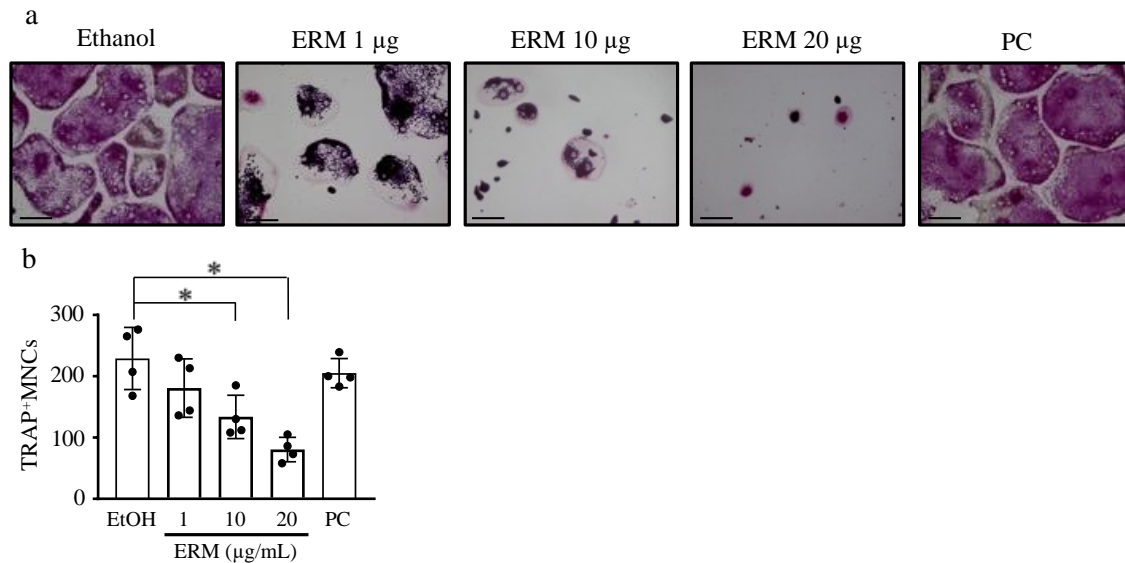

**Figure S2.** Erythromycin dose-dependently suppresses osteoclast differentiation in vitro. RANKL-induced osteoclastogenesis and bone resorption activity were determined in mouse bone marrow-derived osteoclast precursors in the presence of ethanol (EtOH; control), erythromycin (ERM; 1, 10, 20  $\mu$ g/mL), or penicillin (PC; 5 units/mL). (a) Representative images of tartrate-resistant acid phosphatase (TRAP)<sup>+</sup> osteoclasts obtained by optical microscopy are shown. Scale bars, 100  $\mu$ m. (b) Cells were stained for TRAP to detect osteoclasts, and TRAP-reactive MNCs were counted. \* $p < 0.05$ , compared to the indicated group, means  $\pm$  SD ( $n = 5$  per group).

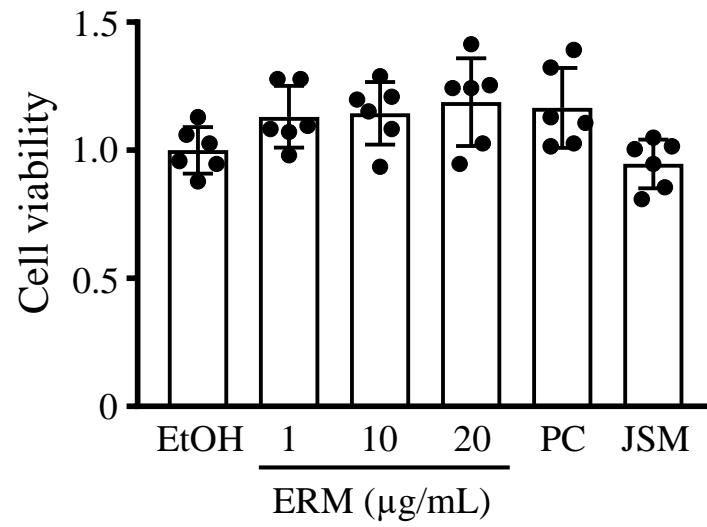

**Figure S3.** Cytotoxicity of erythromycin (ERM), penicillin (PC), and josamycin (JSM) in osteoclasts. Cell viability was assessed using the MTT assay on fluoresceinamine-labeled sodium chondroitin polysulfate/calcium phosphate (FACPS/CaP)-coated plates. Cells were treated with ERM (1, 10, and 20  $\mu\text{g/mL}$ ), PC (5 unit/mL), or JSM (10  $\mu\text{g/mL}$ ) for 6 days. Means  $\pm$  SD.
