# Supplementary figures and images for: Effects of Erythromycin on Osteoclasts and Bone Resorption via DEL-1 Induction in Mice
Source: MDPI journal article supplement (doi:10.3390/antibiotics10030312), 2021-03-17

a

Ethanol

ERM 1  $\mu\text{g}$ ERM 10  $\mu\text{g}$ ERM 20  $\mu\text{g}$ 

PC

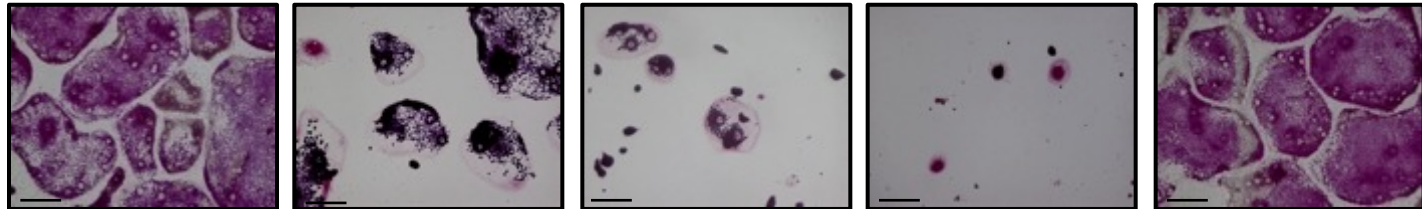

b

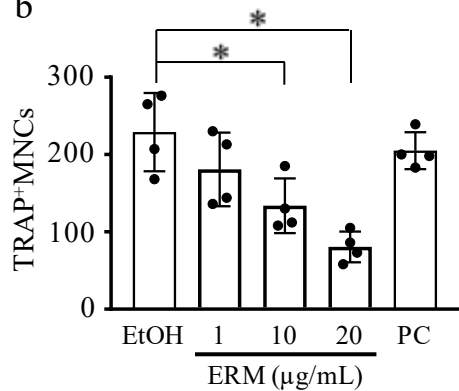

Supplement: s1 [file s1]

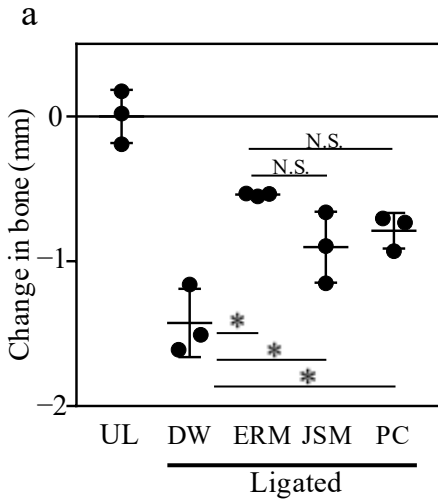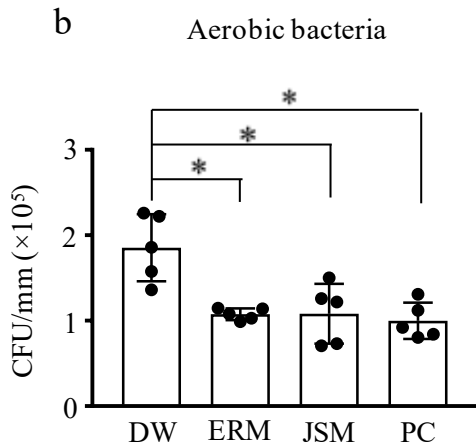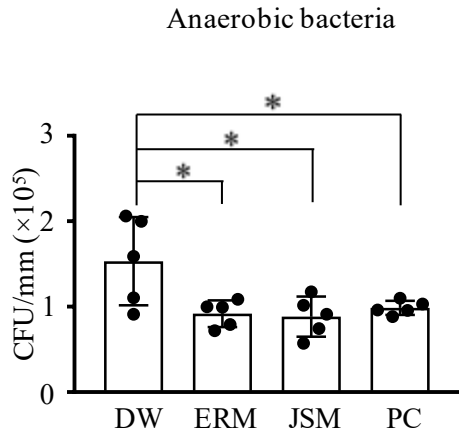

Supplement: s1 [file s1]

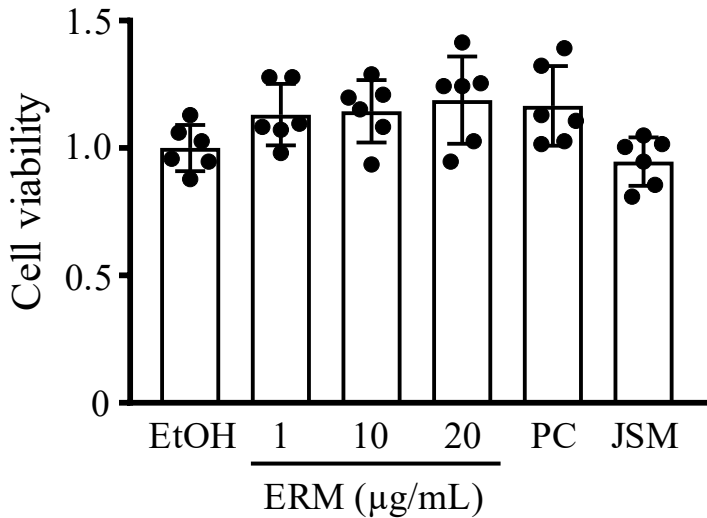

Supplement: s1 [file s1]
